# Supplementary material
Source: PubMed Central journal article supplement (PMC8086892)
Supplement: NIHMS1625561-supplement-Supplemental_Information.pdf [file NIHMS1625561-supplement-Supplemental_Information.pdf]

**SUPPLEMENTAL INFORMATION: Investigation of the Structure-Activity Relationship in Ponericin L1 from *Neoponera goeldii***

Alexandria S. Senetra<sup>1</sup>, Matthew R. Necelis<sup>1</sup>, and Gregory A. Caputo<sup>1,2,\*</sup>

<sup>1</sup> *Department of Chemistry and Biochemistry, Rowan University, 201 Mullica Hill Road Glassboro, NJ 08028*

<sup>2</sup> *Department of Molecular and Cellular Biosciences, Rowan University, 201 Mullica Hill Road Glassboro, NJ 08028*

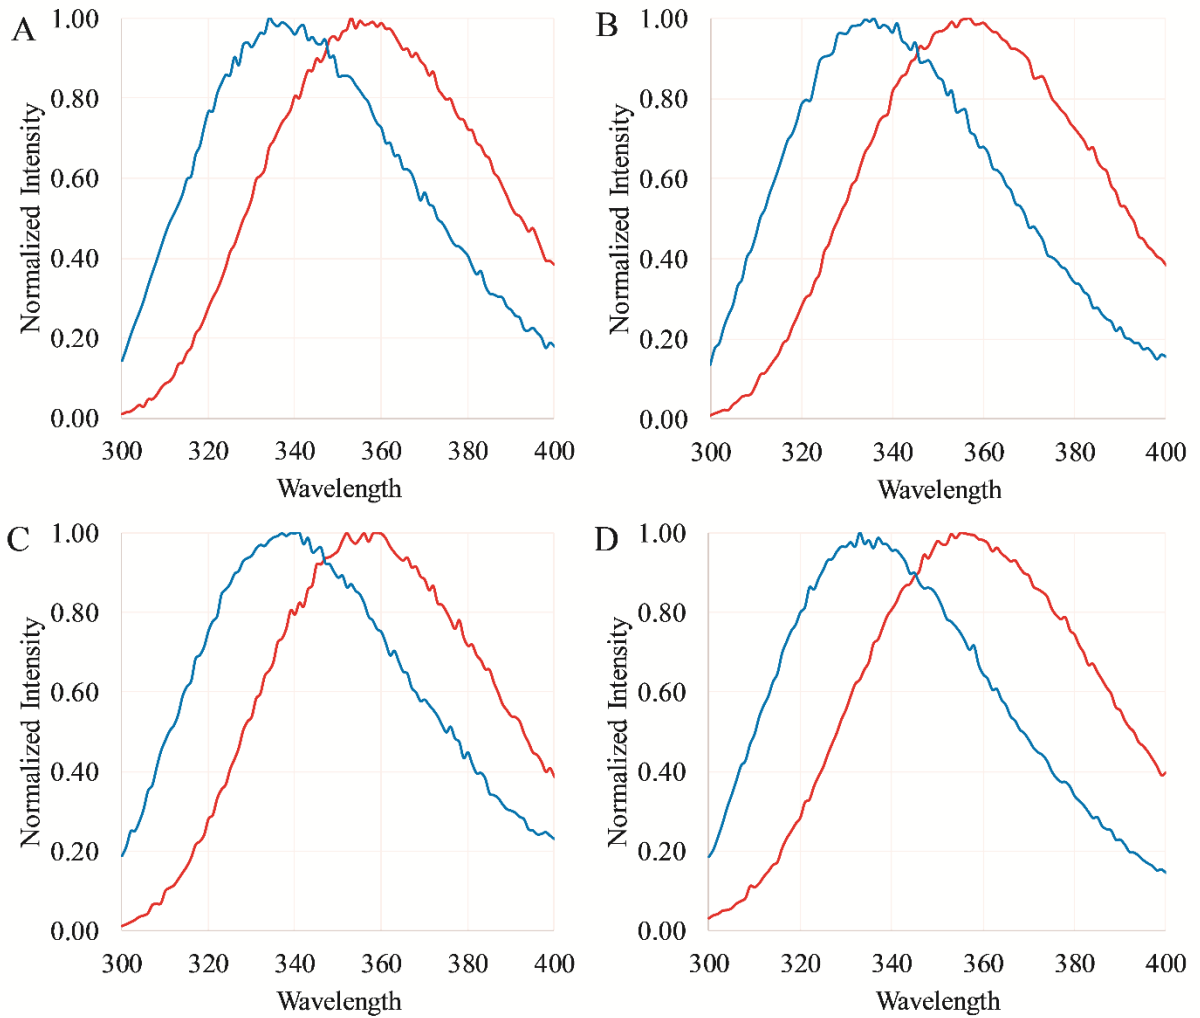

Supplemental Figure 1: Normalized Trp emission spectra for L1 peptide before (red) and after (blue) interacting with lipid vesicles. Data are representative spectra after subtraction of a background spectrum. All samples contained 2  $\mu$ M peptide and 300  $\mu$ M lipid – (A) PC, (B) PC:PG, (C) PC:Chol, (D) PE:PG.

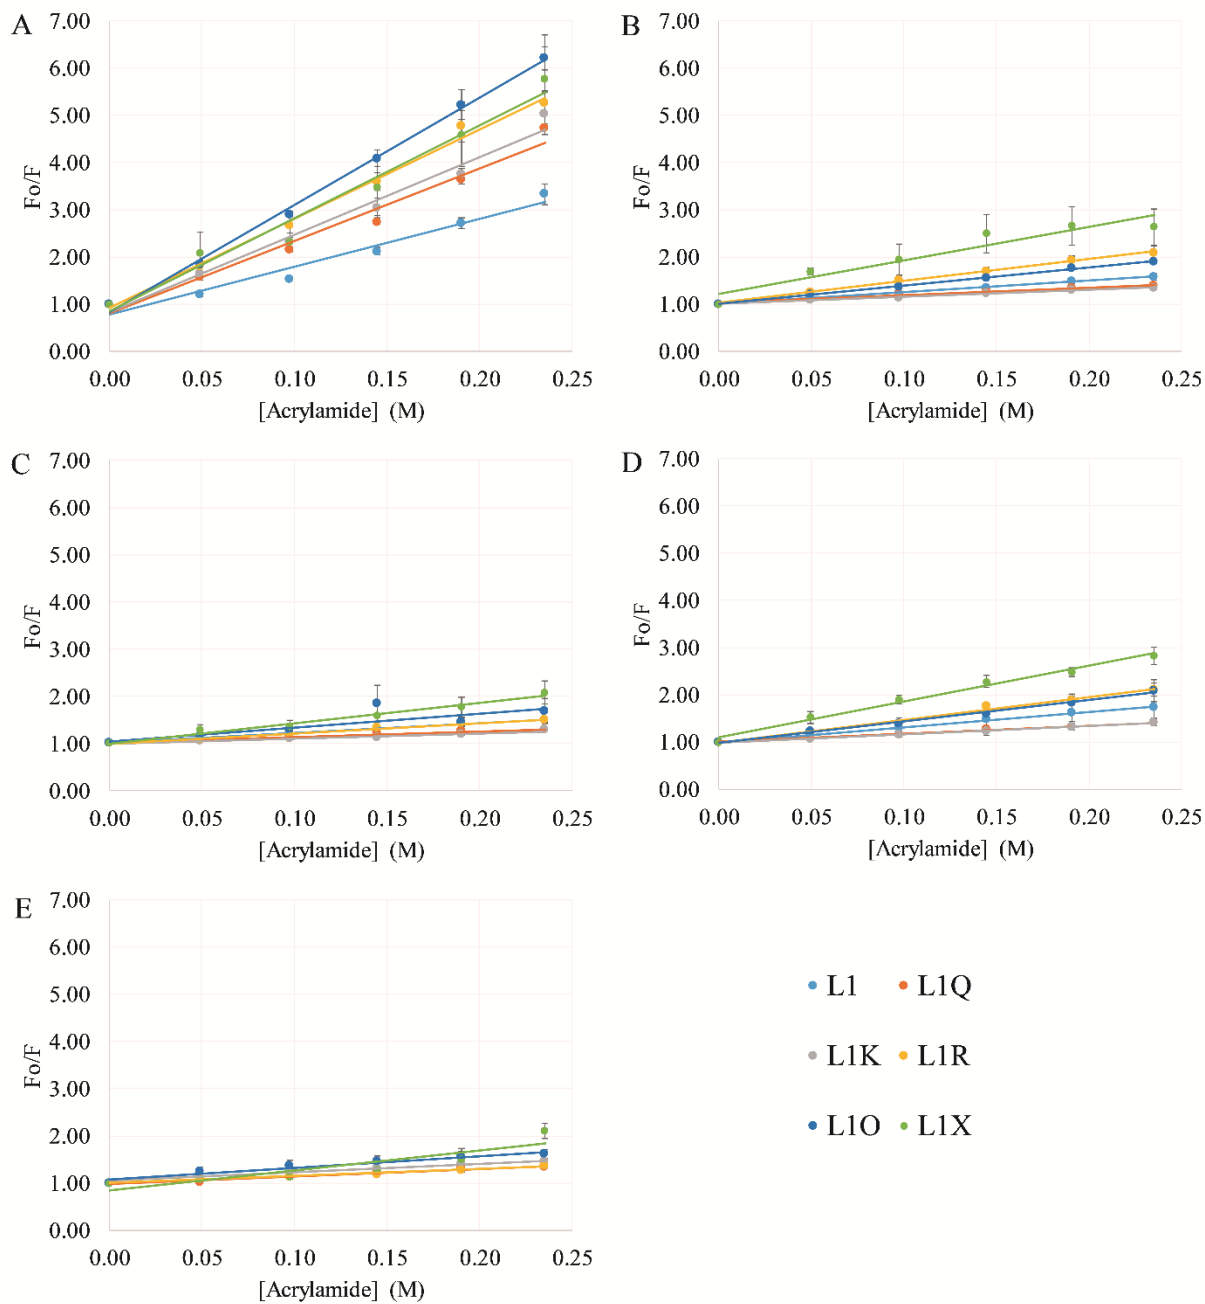

Supplemental Figure 2: Acrylamide Quenching of L1 Peptides in (A) PBS buffer, (B) PC vesicles, (C) PC:PG vesicles, (D) PC:Chol vesicles or (E) PE:PG vesicles. All samples contained 2  $\mu\text{M}$  peptide and 250  $\mu\text{M}$  lipid (for those with vesicles). Data are corrected for inner filter effects and are background subtracted. Data represent the average and standard deviation of 3-6 samples.

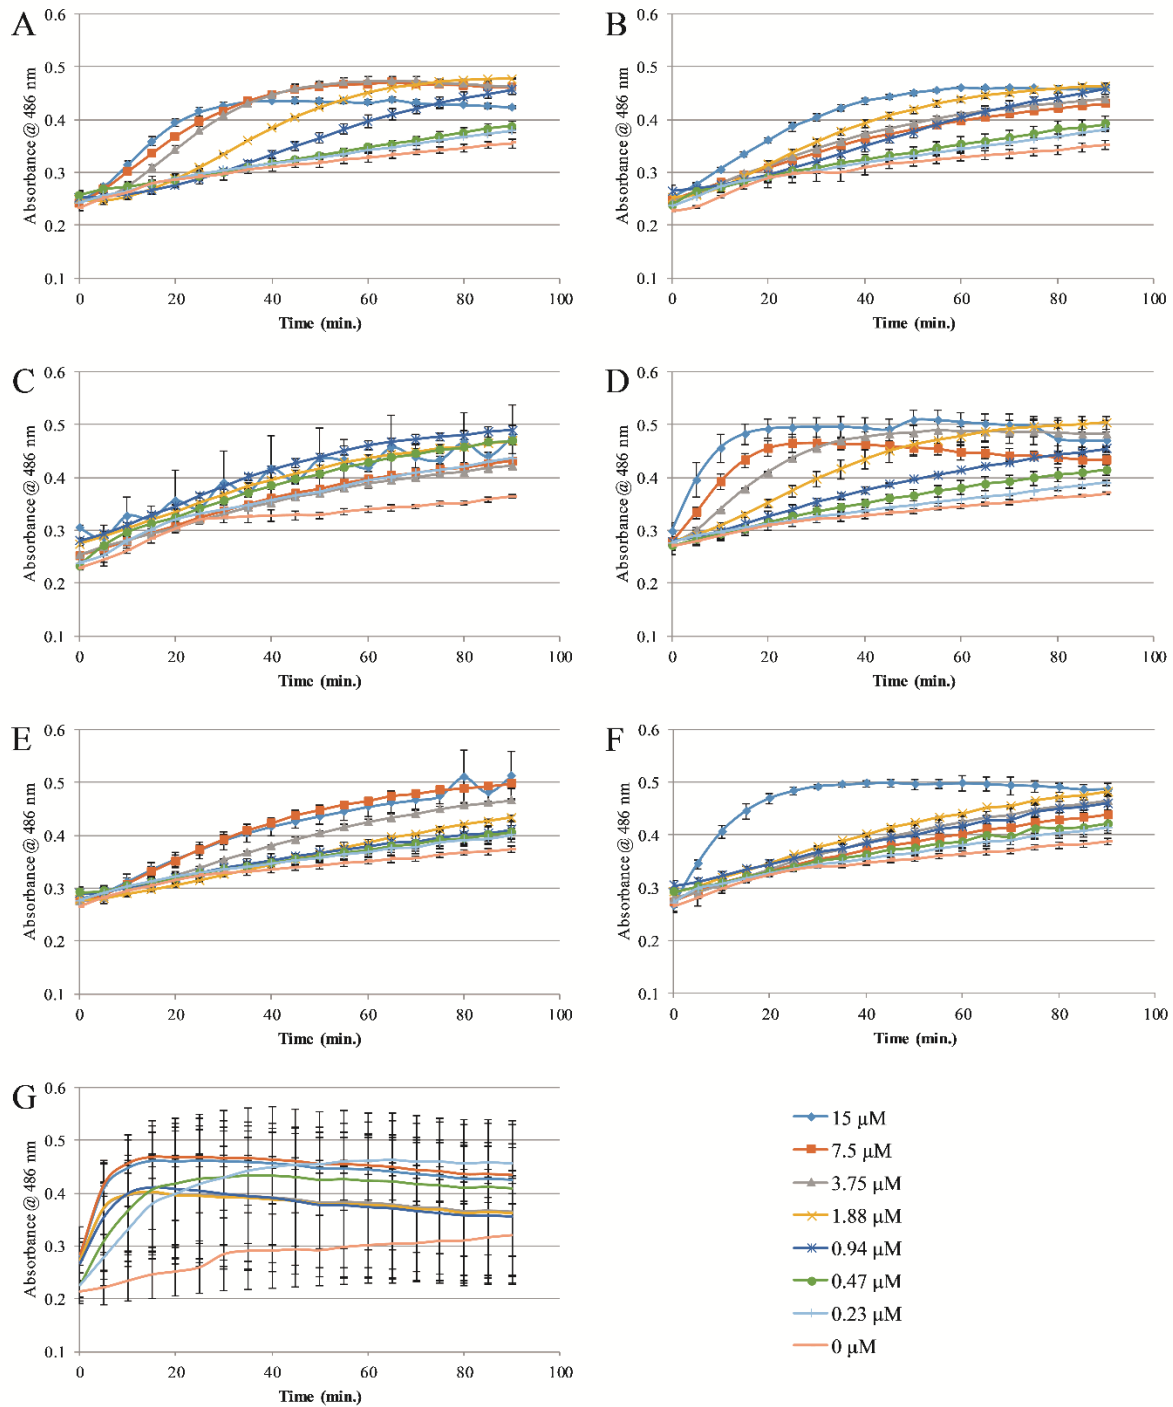

Supplemental Figure 3: *E. coli* outer membrane permeabilization. Absorbance at 486 nm represents the breakdown of the nitrocefin substrate by the periplasmic enzyme  $\beta$ -lactamase. Bacteria were exposed to varying concentrations of peptide and the corresponding colors for each panel are shown in the legend. (A) L1, (B) L1-Q, (C) L1-K, (D) L1-R, (E) L1-O, (F) L1-X, (G) Polymyxin B. Data represent the average and standard deviation of 3-6 samples.

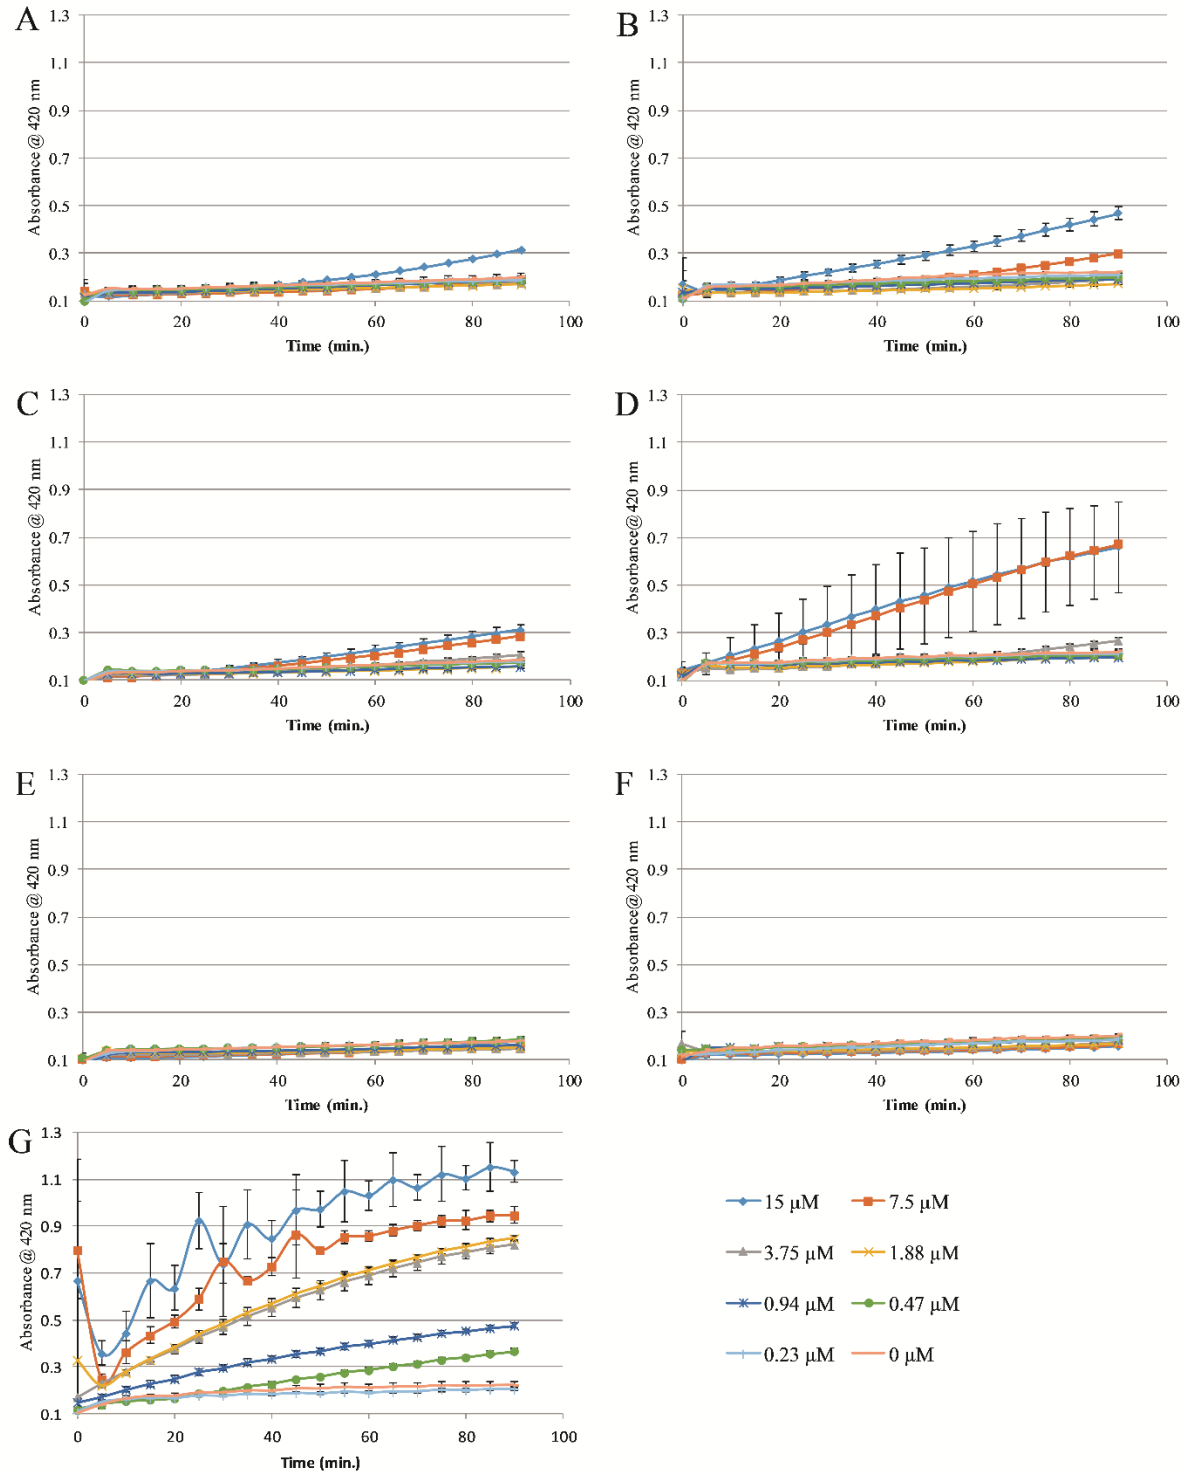

Supplemental Figure 4: *E. coli* inner membrane permeabilization. Absorbance at 420 nm represents the breakdown of the ONPG substrate by the periplasmic enzyme  $\beta$ -galactosidase. Bacteria were exposed to varying concentrations of peptide and the corresponding colors for each panel are shown in the legend. (A) L1, (B) L1-Q, (C) L1-K, (D) L1-R, (E) L1-O, (F) L1-X, (G) cetyltrimethylammonium bromide (CTAB). Data represent the average and standard deviation of 3-6 samples.

Table S1  
Ponericin Peptide Family Sequence Comparison

| Name | Amino Acid Sequence <sup>a</sup> | Length | MW <sup>b</sup> | Net Charge <sup>c</sup> |
|------|----------------------------------|--------|-----------------|-------------------------|
| L1   | LLKELWTKMKGAGKAVLGKIKGLL         | 24     | 2596            | +5                      |
| L2   | LLKELWTKIKGAGKAVLGKIKGLL         | 24     | 2578            | +5                      |
| G1   | GWKDWAKKAGGWLKKKGPGMAKAALKAAMQ   | 30     | 3214            | +7                      |
| G2   | GWKDWLKKGKEWLKAKGPGIVKAALQAATQ   | 30     | 3308            | +5                      |
| G3   | GWKDWLNKGKEWLKKKGPGIMKAALKAATQ   | 30     | 3383            | +6                      |
| G4   | DFKDWMTAGEWLKKKGPGILKAAMAAAT     | 29     | 3165            | +3                      |
| G5   | GLKDWVKIAGGWLKKKGPGILKAAMAAATQ   | 30     | 3109            | +5                      |
| G6   | GLVDVLGKVGGLIKKLLP               | 18     | 1819            | +2                      |
| G7   | GLVDVLGKVGGLIKKLLPG              | 19     | 1876            | +2                      |
| W1   | WLGSALKIGAKLLPSVVGLFKKKKQ        | 25     | 2710            | +6                      |
| W2   | WLGSALKIGAKLLPSVVGLFQKKKK        | 25     | 2710            | +6                      |
| W3   | GIWGTAKIGIKAVPRVISMLKKKKQ        | 26     | 2864            | +7                      |
| W4   | GIWGTALKWGVKLLPKLVGMAQTKKQ       | 26     | 2853            | +5                      |
| W5   | FWGALIKGAAKLIPSVVGLFKKKQ         | 24     | 2600            | +5                      |
| W6   | FIGTALGIASAIPAIVKLFK             | 20     | 2031            | +2                      |

a Sequences are from NCBI annotated under old classification *Pachycondyla goeldii*

b MW calculated using ExPASy ProtParam and rounded to nearest whole digit

c charge assuming pH 7 and free N/C termini

---

**Table S2: TCE Quenching**

|      | <b>K<sub>sv</sub> (M<sup>-1</sup>)</b> |   |      |
|------|----------------------------------------|---|------|
| L1   | 0.30                                   | ± | 0.04 |
| L1-Q | 15.35                                  | ± | 3.75 |
| L1-K | 17.63                                  | ± | 1.21 |
| L1-R | 4.23                                   | ± | 2.78 |
| L1-O | 10.97                                  | ± | 1.25 |
| L1-X | 10.50                                  | ± | 2.53 |

---
